# Supplementary material for: Incidence and severity of immune-related hepatitis after dual checkpoint therapy is linked to younger age independent of herpes virus immunity
Source: Springer Nature journal article supplement (doi:10.1186/s12967-022-03755-3), 2022-12-12
Supplement: MOESM1 [file 23816266]

s.Fig.1 Characteristics of discovery cohort.

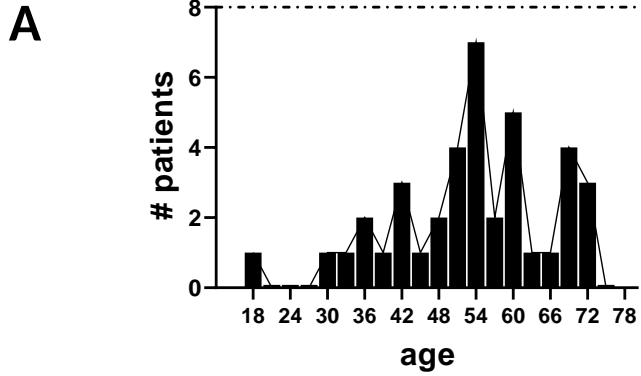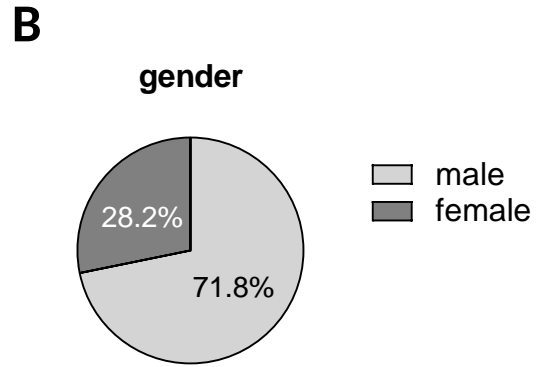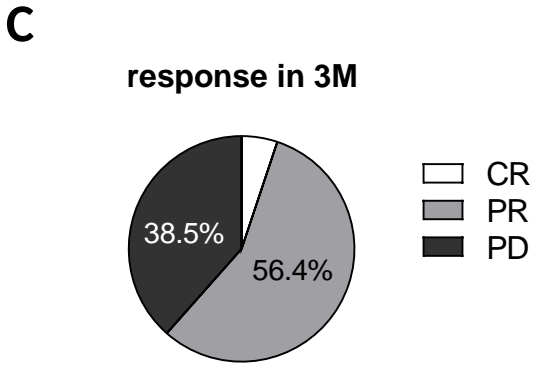

s.Fig.2 Workflow of patient selection

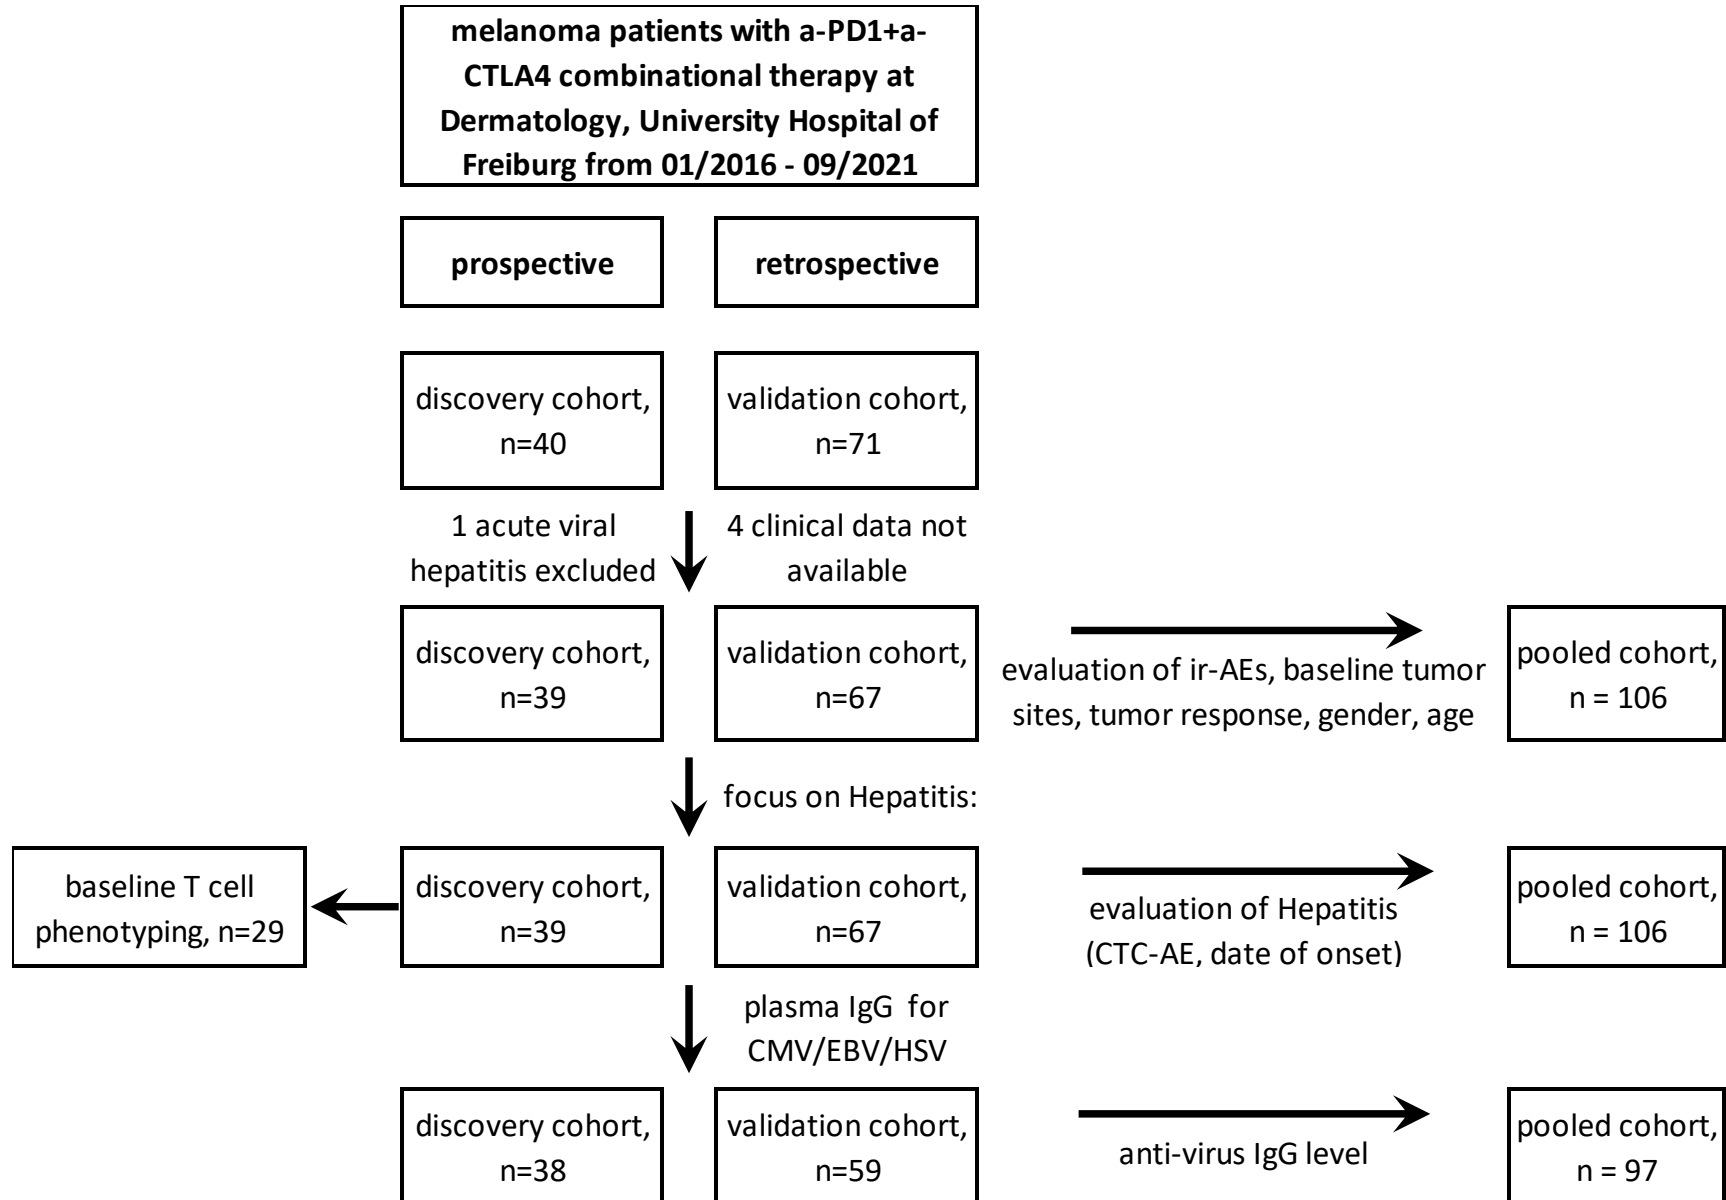

# s.Fig.3 Baseline AST and ALT values are associated with therapy-induced hepatitis.

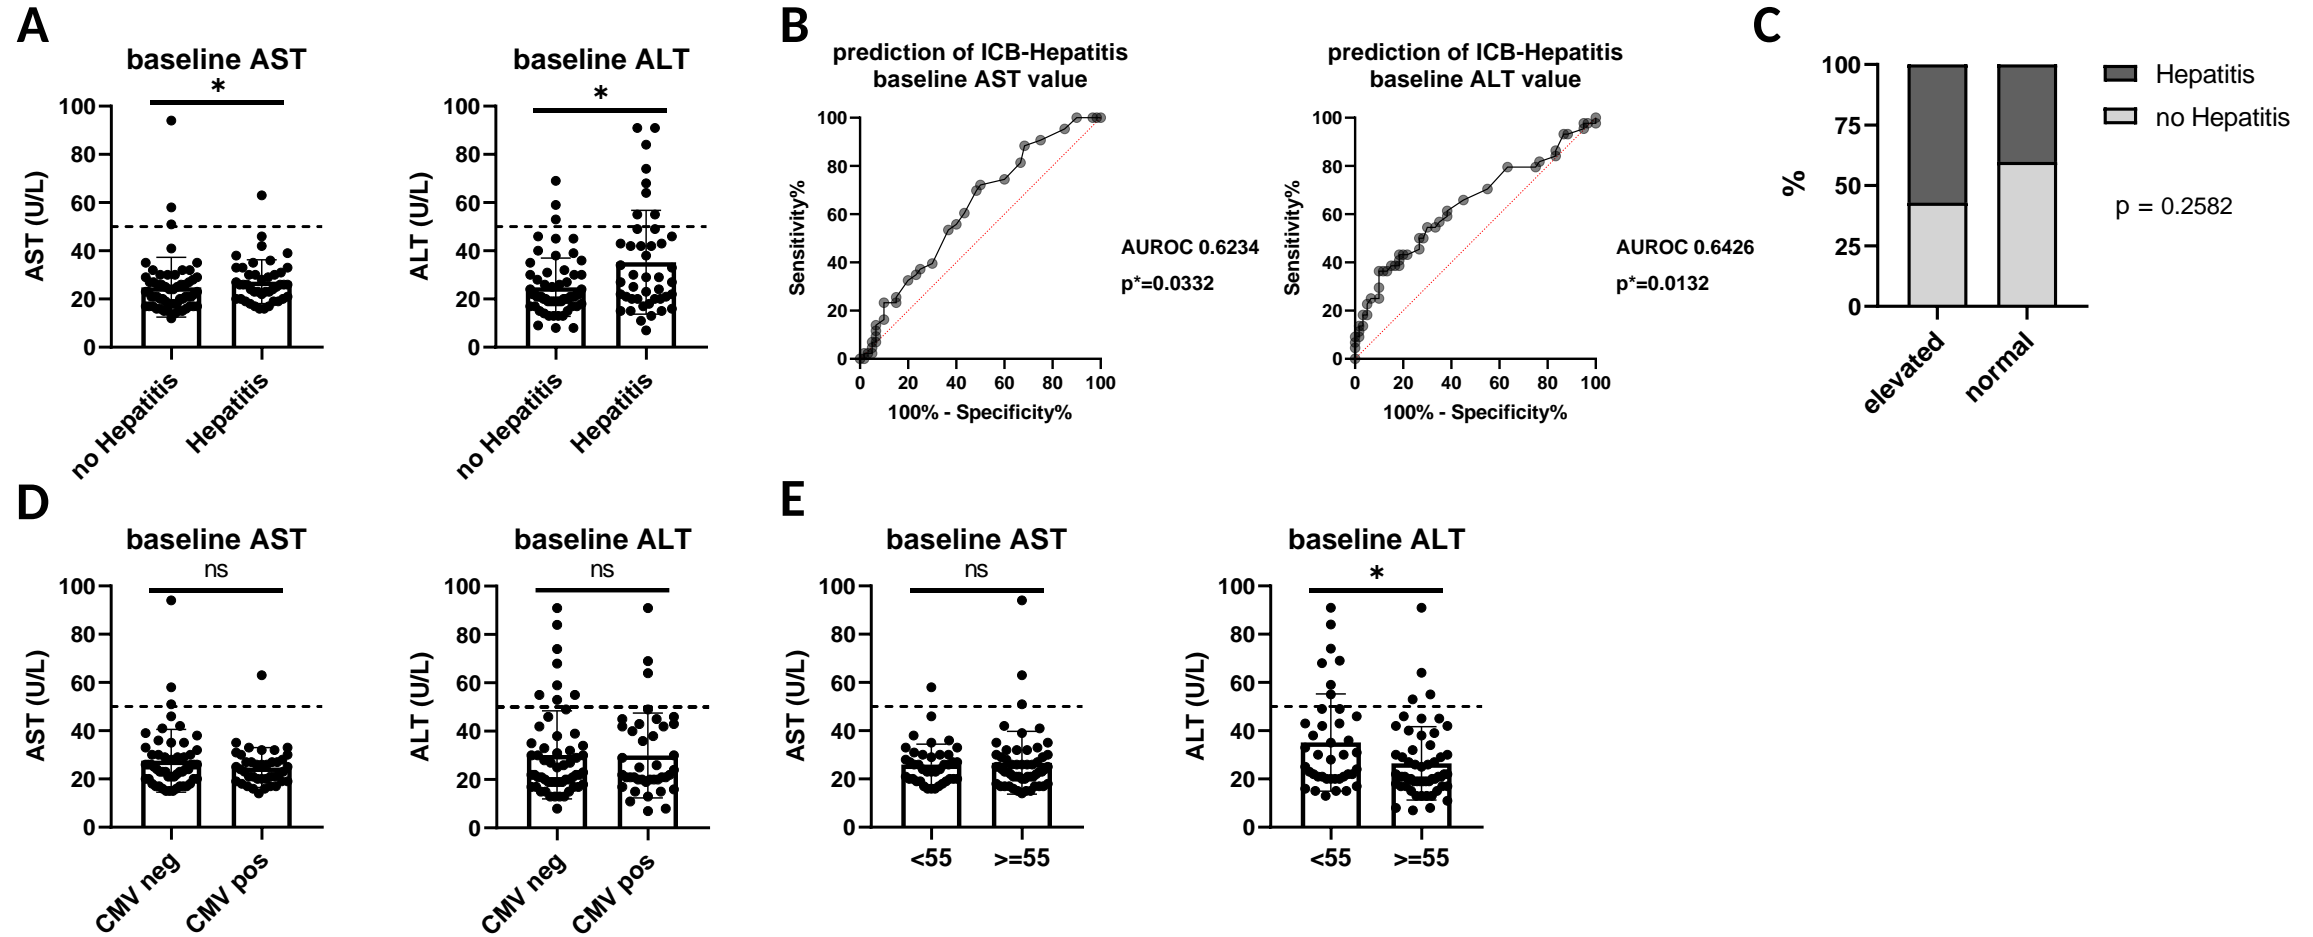

**s.Fig.4 EBV/HSV/CMV IgG serostatus does not correlate with Immune-checkpoint hepatitis.**

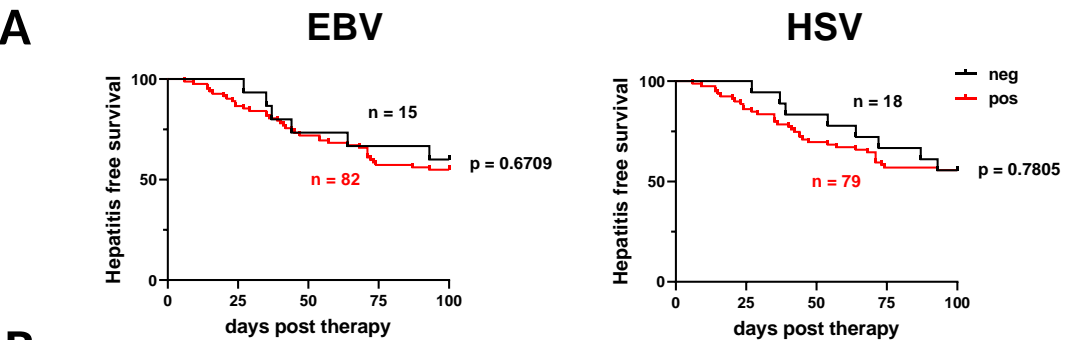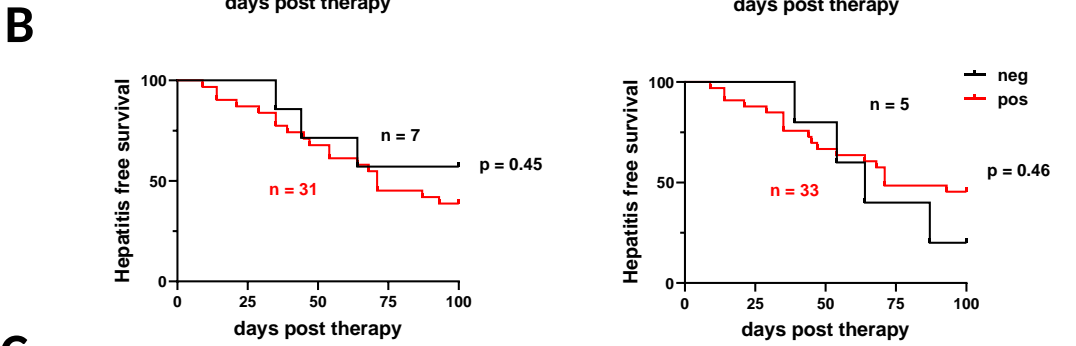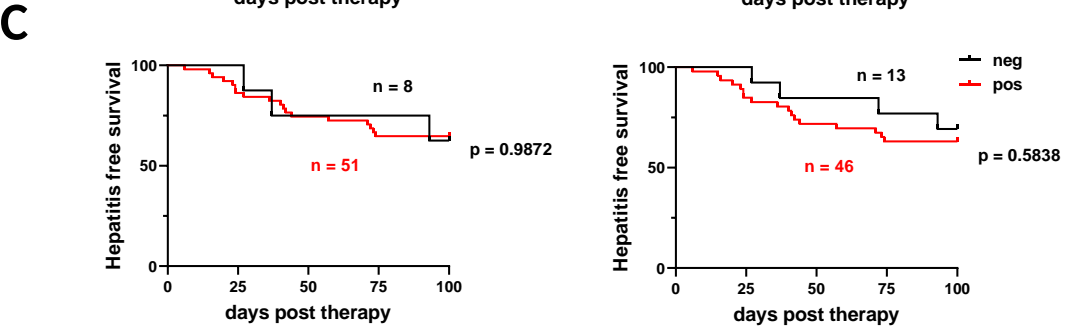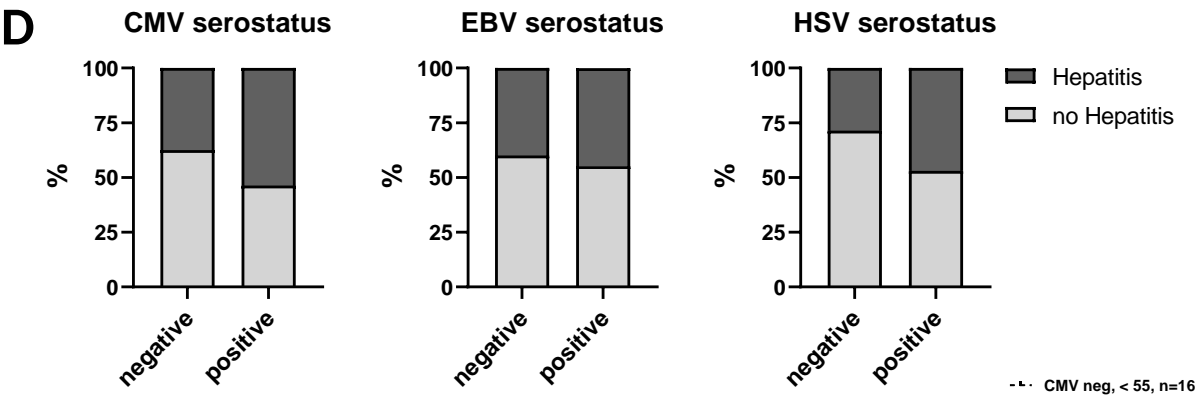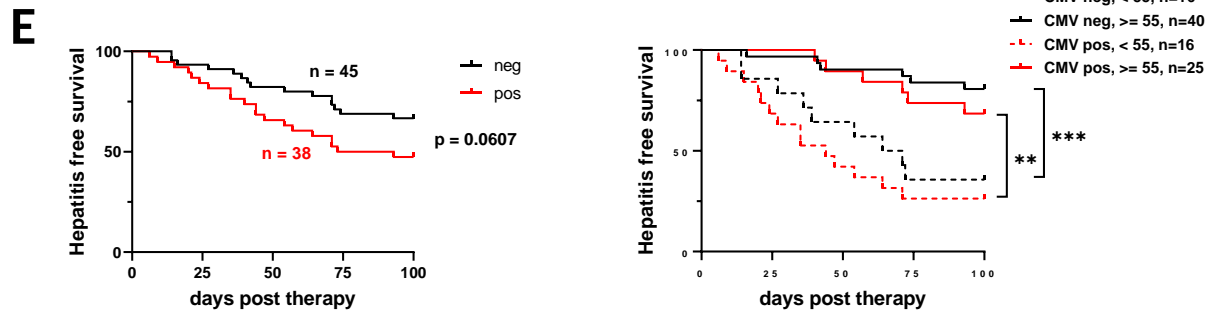

s.Fig.5 Gating strategies for CD4 and CD8 subpopulations.

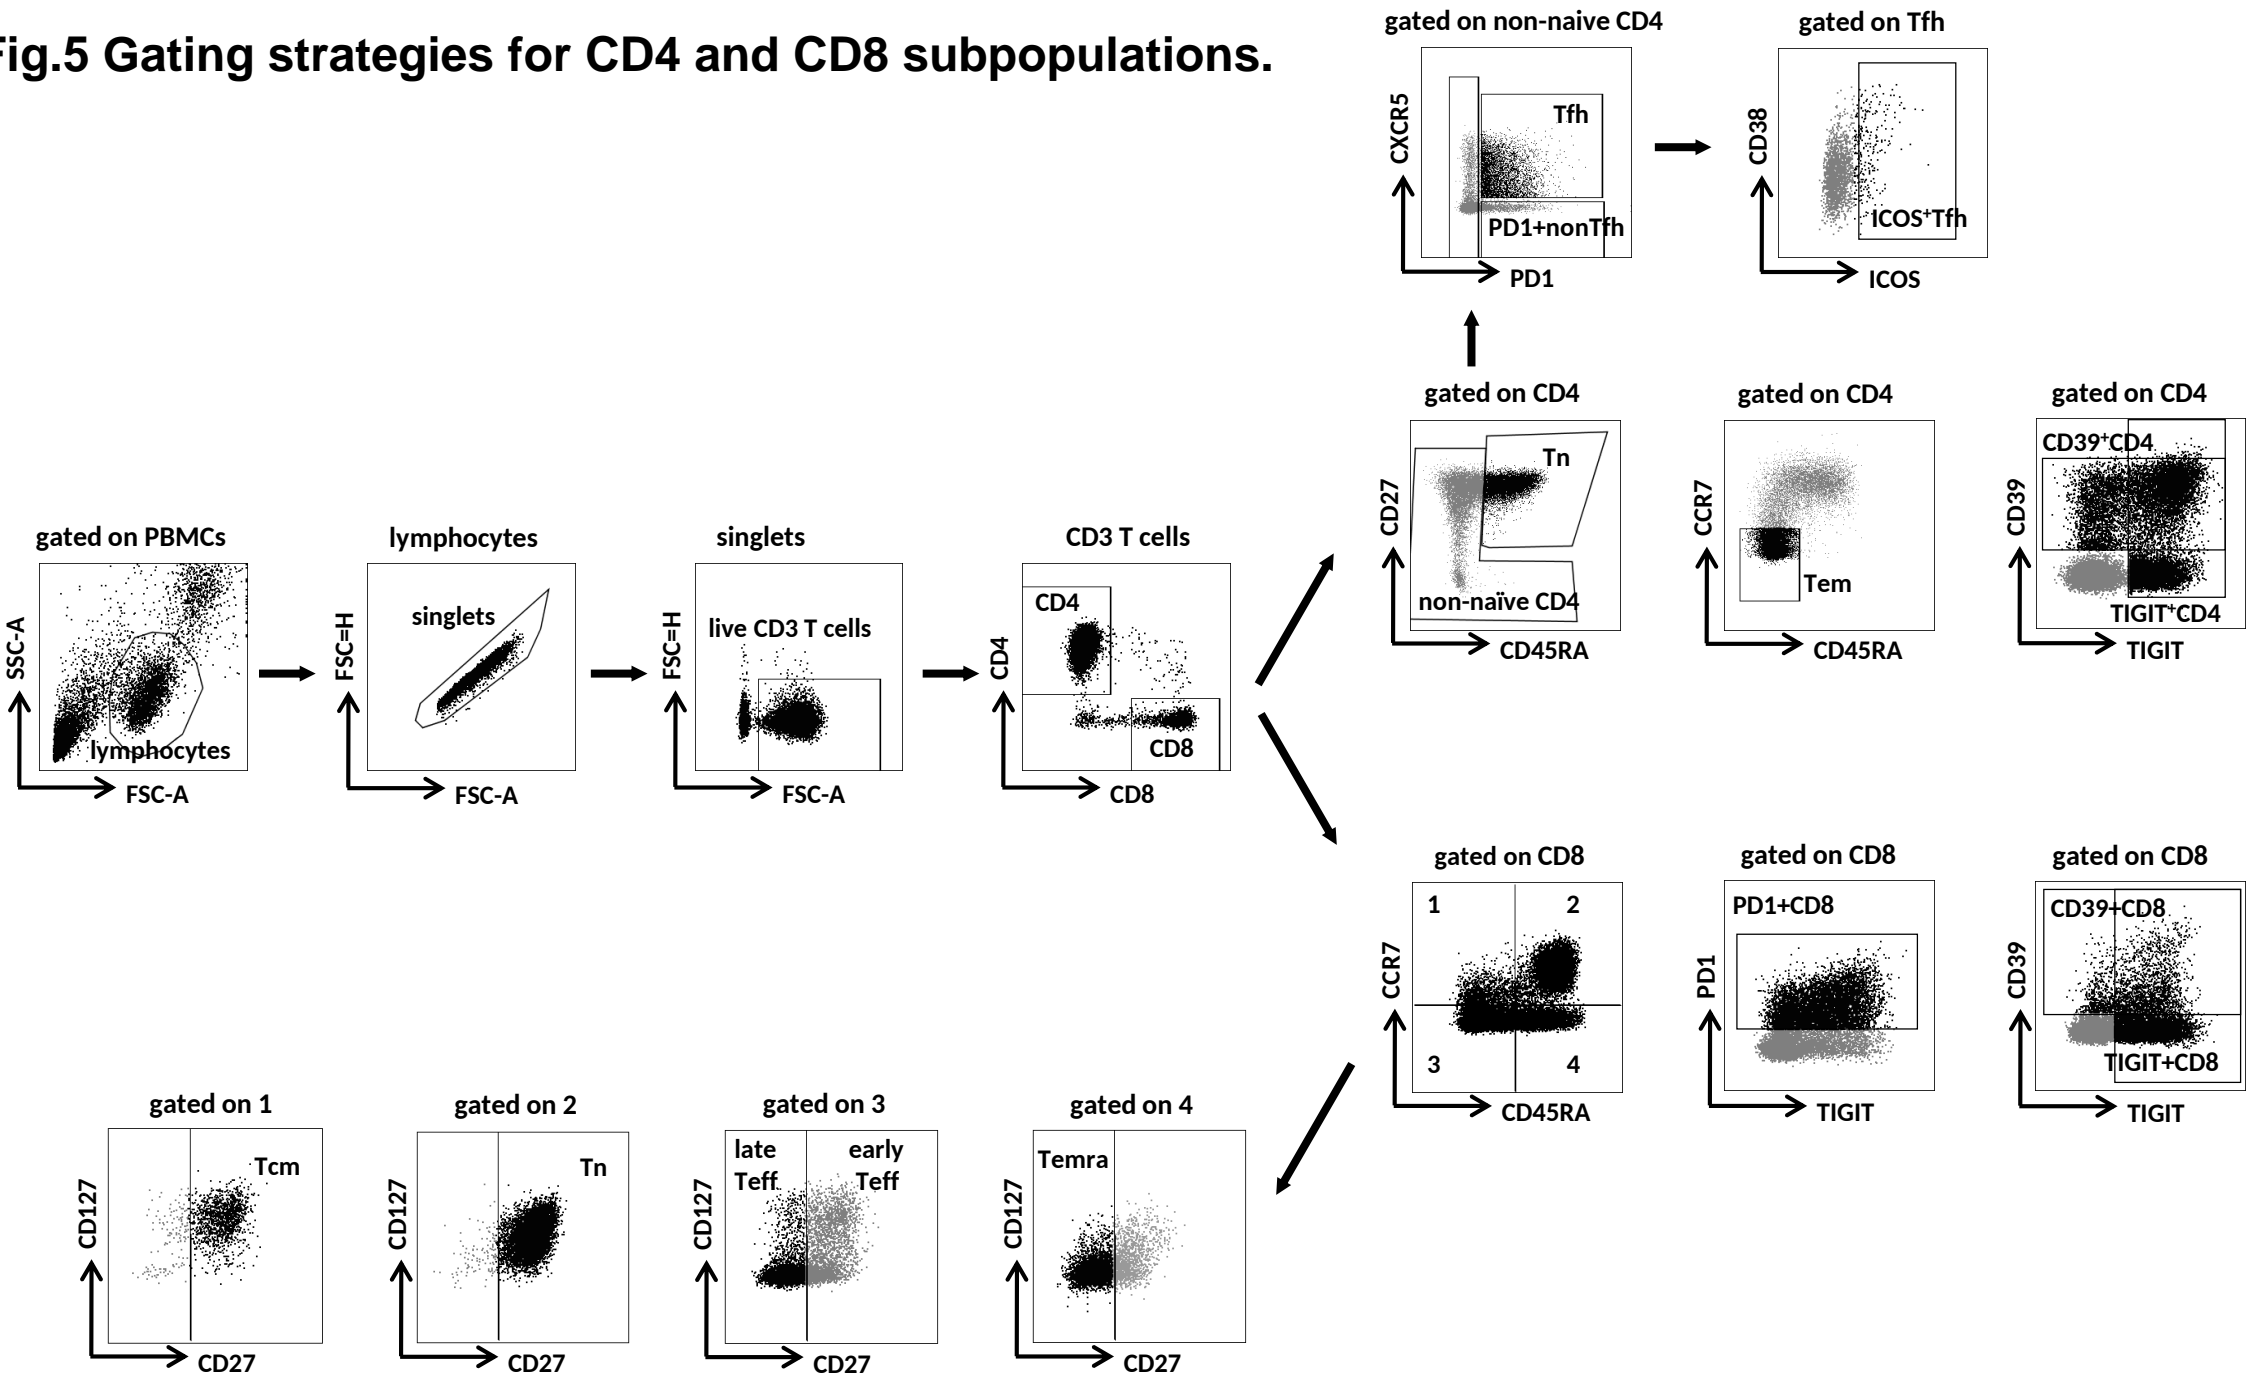

s.Fig.6 Age-associated T cell populations are not related to incidence of Hepatitis

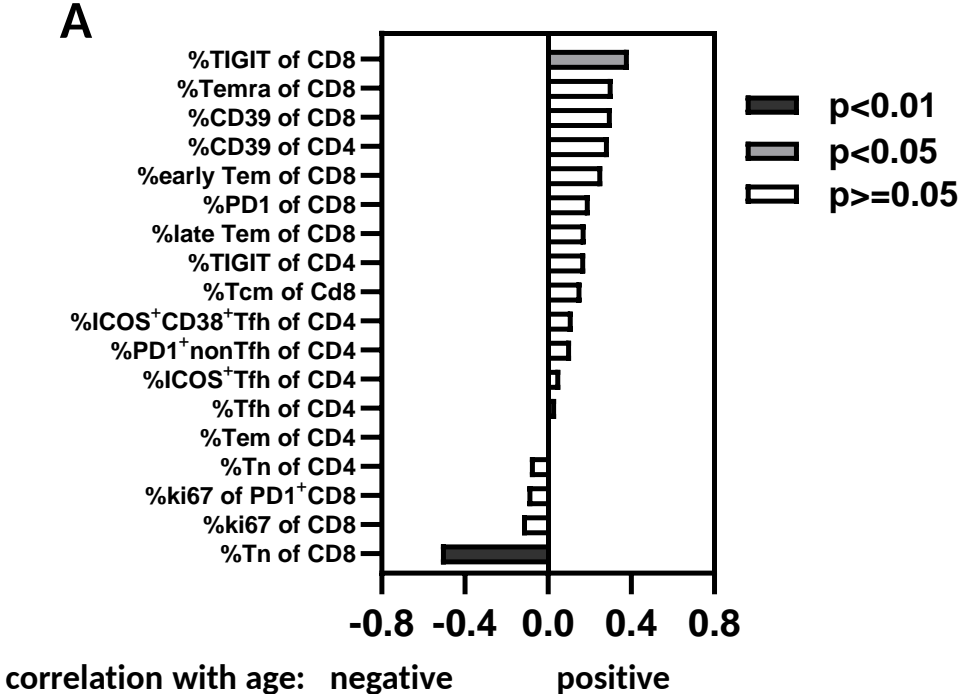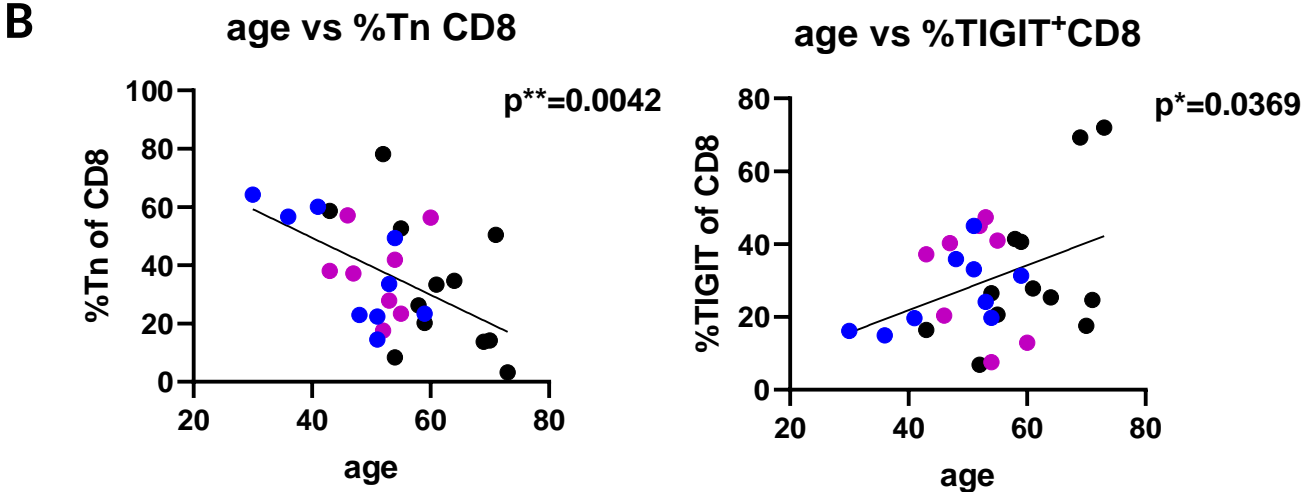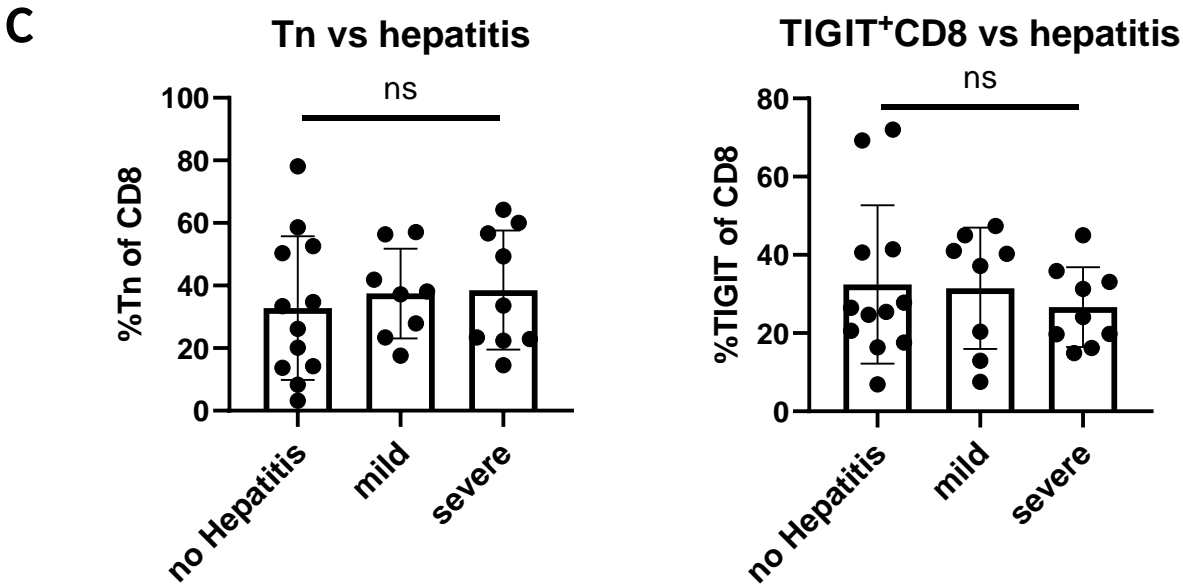

s.Fig.7 Tumor progression-free survival analysis according to ICB-hepatitis, age and irAE

**A**

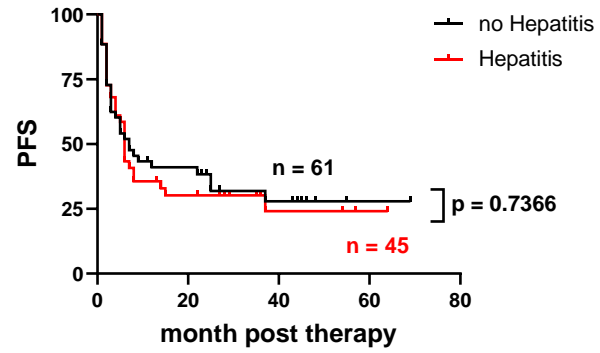

**B**

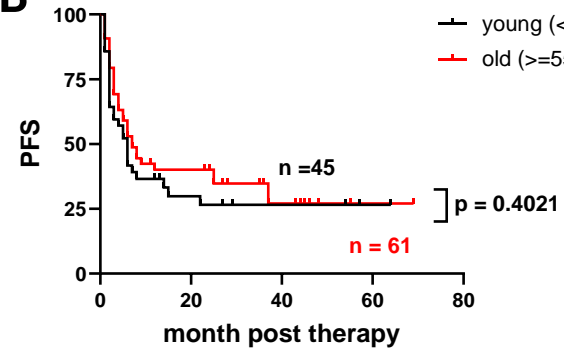

**C**

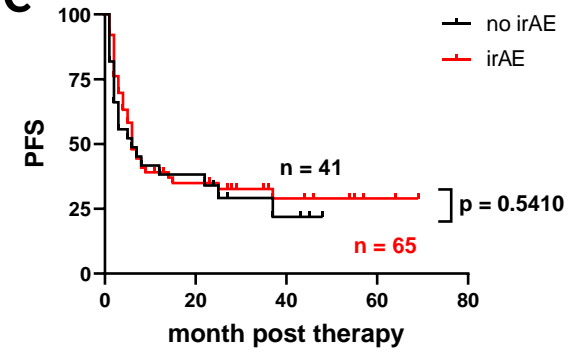

Supplemental Table 1:

|                      | hepatitis | no hepatitis | total |
|----------------------|-----------|--------------|-------|
| responders(CR+PR+SD) | 16        | 9            | 25    |
| non-responders(PD)   | 8         | 6            | 14    |

p=0.7397

|        | hepatitis | no hepatitis | total |
|--------|-----------|--------------|-------|
| male   | 16        | 12           | 28    |
| female | 7         | 4            | 11    |

p>0.99

Contingency table comparing distribution of tumor response and gender in patients with/without hepatitis in discovery cohort.



Supplemental Table 2:

|                                     | discovery cohort(n=39) | validation cohort(n=67) | test performed                    | p value |
|-------------------------------------|------------------------|-------------------------|-----------------------------------|---------|
| <b>age</b>                          |                        |                         |                                   |         |
| median age                          | 54                     | 60                      | Mann-Whitney Test<br>(two-tailed) | 0.0305  |
| min. age                            | 19                     | 25                      |                                   |         |
| max. age                            | 73                     | 80                      |                                   |         |
| <b>gender</b>                       |                        |                         |                                   |         |
| male                                | 28                     | 46                      | Chi Square Test                   | 0.7343  |
| female                              | 11                     | 21                      |                                   |         |
| <b>tumor response in 3 months §</b> |                        |                         |                                   |         |
| CR                                  | 2                      | 7                       | Chi Square Test                   | <0.0001 |
| PR                                  | 22                     | 9                       |                                   |         |
| SD                                  | 0                      | 14                      |                                   |         |
| PD                                  | 15                     | 26                      |                                   |         |
| NE                                  | 0                      | 11                      |                                   |         |
| <b>no. of ir-AEs</b>                |                        |                         |                                   |         |
| 0                                   | 8                      | 29                      | Chi Square Test                   | 0.0016  |
| 1                                   | 10                     | 18                      |                                   |         |
| 2                                   | 6                      | 15                      |                                   |         |
| 3                                   | 9                      | 4                       |                                   |         |
| >= 4                                | 6                      | 1                       |                                   |         |
| <b>incidence of Hepatitis</b>       |                        |                         |                                   |         |
| no Hepatitis                        | 16                     | 45                      | Chi Square Test                   | 0.0086  |
| Hepatitis                           | 23                     | 22                      |                                   |         |
| <b>severity of Hepatitis</b>        |                        |                         |                                   |         |
| CTC-AE I                            | 1                      | 1                       | Chi Square Test                   | 0.8369  |
| CTC-AE II                           | 8                      | 5                       |                                   |         |
| CTC-AE III                          | 10                     | 12                      |                                   |         |
| CTC-AE IV                           | 4                      | 4                       |                                   |         |

Clinical information of patients included in the discovery and validation cohort.

§ CR: complete response, PR: partial response, PD: progression disease, SD: stable disease,

NE: not evaluable. Comparison excluded patients with NE response.

Supplemental Table 3

|                                     | No. of patients evaluated | no Hepatitis, n=61 | Hepatitis, n=45 | test performed                   | p value           |
|-------------------------------------|---------------------------|--------------------|-----------------|----------------------------------|-------------------|
| <b>age</b>                          |                           |                    |                 |                                  |                   |
| median age                          | n=106                     | 64                 | 52              | Mann-Whitney Test (two-tailed)   | <b>&lt;0.0001</b> |
| min. age                            |                           | 25                 | 19              |                                  |                   |
| max. age                            |                           | 79                 | 80              |                                  |                   |
| <b>gender</b>                       |                           |                    |                 |                                  |                   |
| male                                | n=106                     | 46                 | 28              | Chi Square Test                  | 0.1438            |
| female                              |                           | 15                 | 17              |                                  |                   |
| <b>tumor response in 3 months §</b> |                           |                    |                 |                                  |                   |
| CR                                  | n=94                      | 4                  | 4               | Chi Square Test                  | 0.1482            |
| PR                                  |                           | 13                 | 18              |                                  |                   |
| SD or MR                            |                           | 11                 | 3               |                                  |                   |
| PD                                  |                           | 23                 | 18              |                                  |                   |
| NE                                  |                           | 10                 | 2               |                                  |                   |
| <b>CMV IgG status</b>               |                           |                    |                 |                                  |                   |
| positive                            | n=97                      | 24                 | 22              | Chi Square Test                  | 0.5104            |
| negative                            |                           | 30                 | 21              |                                  |                   |
| <b>AST</b>                          |                           |                    |                 |                                  |                   |
| median(95% CI)                      | n=101                     | 21.5(20-26)        | 26(23-29)       | Mann-Whitney Test (two-tailed)   | <b>0.0326</b>     |
| <b>ALT</b>                          |                           |                    |                 |                                  |                   |
| median(95% CI)                      | n=102                     | 21(19-24)          | 28(22-42)       | Mann-Whitney Test (two-tailed)   | <b>0.0128</b>     |
| <b>liver metastasis</b>             |                           |                    |                 |                                  |                   |
| no                                  | n=106                     | 46                 | 31              | Chi Square Test                  | 0.4567            |
| yes                                 |                           | 15                 | 14              |                                  |                   |
| <b>no. of non-Hepatitis irAE *</b>  |                           |                    |                 |                                  |                   |
| 0                                   | n=106                     | 41                 | 15              | Chi Square Test                  | <b>0.0003</b>     |
| 1                                   |                           | 17                 | 15              |                                  |                   |
| 2                                   |                           | 3                  | 11              |                                  |                   |
| 3                                   |                           | 0                  | 4               |                                  |                   |
| 4                                   |                           | 0                  | 0               |                                  |                   |
| <b>BRAF §</b>                       |                           |                    |                 |                                  |                   |
| other mutations                     | n=101                     | 1                  | 4               | Chi Square Test                  | 0.1784            |
| V600 mutation                       |                           | 24                 | 16              |                                  |                   |
| wt                                  |                           | 35                 | 21              |                                  |                   |
| unknown                             |                           | 1                  | 4               |                                  |                   |
| <b>NRAS §</b>                       |                           |                    |                 |                                  |                   |
| other mutations                     | n=91                      | 2                  | 1               | Chi Square Test                  | 0.7508            |
| Q61 mutation                        |                           | 15                 | 14              |                                  |                   |
| wt                                  |                           | 35                 | 24              |                                  |                   |
| unknown                             |                           | 9                  | 6               |                                  |                   |
| <b>stage</b>                        |                           |                    |                 |                                  |                   |
| III                                 | n=106                     | 3                  | 2               | Fisher's Exact Test (two-tailed) | >0.9999           |
| IV                                  |                           | 58                 | 43              |                                  |                   |
| <b>LDH level</b>                    |                           |                    |                 |                                  |                   |
| normal                              | n=93                      | 26                 | 23              | Chi Square Test                  | 0.5587            |
| elevated                            |                           | 26                 | 18              |                                  |                   |
| <b>HBsAg</b>                        |                           |                    |                 |                                  |                   |
| negative                            | n=99                      | 55                 | 43              | Fisher's Exact Test (two-tailed) | >0.9999           |
| positive                            |                           | 1                  | 0               |                                  |                   |
| <b>anti-HBc antibody</b>            |                           |                    |                 |                                  |                   |
| negative                            | n=99                      | 53                 | 39              | Fisher's Exact Test (two-tailed) | 0.4638            |
| positive                            |                           | 3                  | 4               |                                  |                   |
| <b>anti-HBs antibody</b>            |                           |                    |                 |                                  |                   |
| negative                            | n=99                      | 44                 | 26              | Chi Square Test                  | <b>0.0497</b>     |
| positive                            |                           | 12                 | 17              |                                  |                   |
| <b>anti-HCV antibody</b>            |                           |                    |                 |                                  |                   |
| negative                            | n=98                      | 55                 | 43              | Fisher's Exact Test (two-tailed) | >0.9999           |
| positive                            |                           | 0                  | 0               |                                  |                   |
| <b>anti-HIV antibody</b>            |                           |                    |                 |                                  |                   |
| negative                            | n=98                      | 55                 | 43              | Fisher's Exact Test (two-tailed) | >0.9999           |
| positive                            |                           | 0                  | 0               |                                  |                   |

f patients who developed hepatitis or not in pooled cohort

\* only included skin abnormality, thyroiditis, enteritis and hypophysitis

§ Comparison excluded patients with NE response or unknown status
